# Supplementary material for: Personal Accounts: Resilience: Message From a “Mengele Twin” Survivor
Source: Atypon-hosted journal article supplement (doi:10.1176/ps.62.10.pss6210_1127), 2011-10-01

## FIGURES

**Figure 1:** "Selection" by Dr. Josef Mengele (white ↑) at the Ramp of Auschwitz (1944).

**Inserts:** Dr. Mengele as (A) chief medical SS officer and (B) physician in Auschwitz. He was in charge of the killing machinery of Auschwitz and also performed medical experimentation on prisoners.

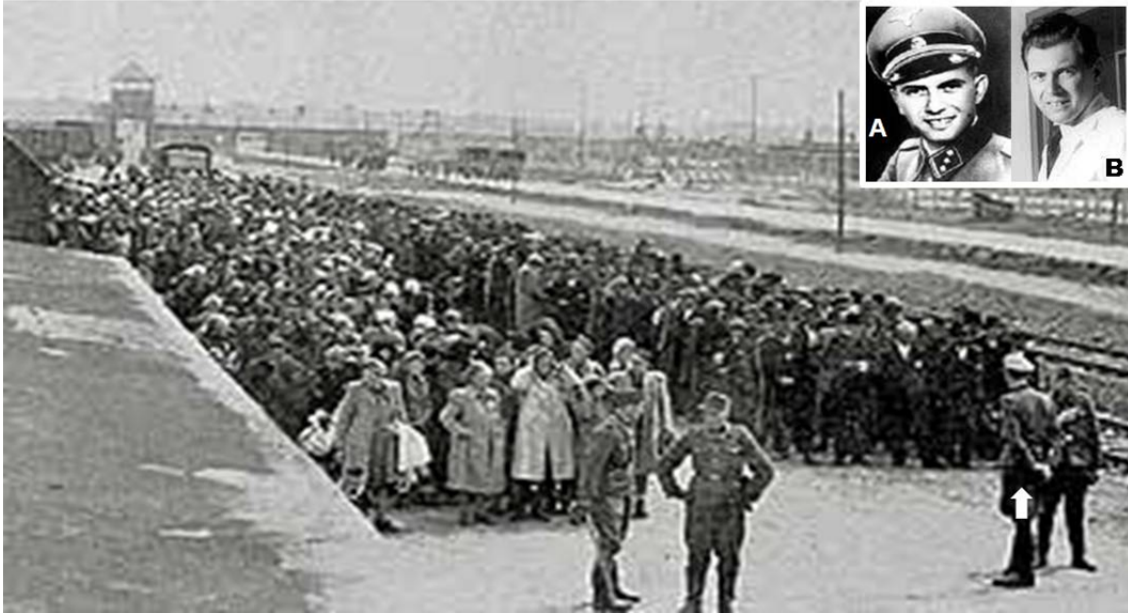

**Figure 2:** Holocaust survivor E.R. (born 1927 in Budapest) was victim of Dr. Mengele's medical experiments in Auschwitz, 1944. Toxic agents were injected to his larynx. (A) shows his concentration camp number tattoo. (B) 20 years afterwards he needed repeated surgeries to his neck including skin grafting. (C) He lost his voice, but is capable of producing an artificial voice with an external voice amplifier.

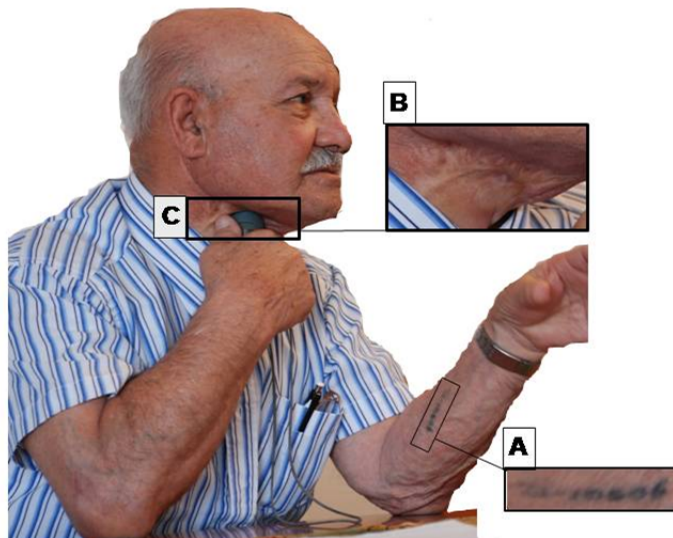

Supplement: Gesundheit_ds.pdf [file Gesundheit_ds.pdf]
